# Supplementary material for: A semi-automated organoid screening method demonstrates epigenetic control of intestinal epithelial differentiation
Source: bioRxiv or medRxiv preprint supplement (doi:10.1101/2020.07.23.217414), 2020-12-11
Supplement: Supplementary file [file media-4.pdf]

**Table 3:**  
**Materials, Reagents, Software**

| Item                                        | Supplier                 | Specification    | Publication   | Comment                                                                                   |
|---------------------------------------------|--------------------------|------------------|---------------|-------------------------------------------------------------------------------------------|
| <b>Mice</b>                                 |                          |                  |               |                                                                                           |
| C57BL/6J wild type                          | Janvier Labs             |                  |               |                                                                                           |
| C57BL/6 wild type                           |                          |                  |               |                                                                                           |
| B6D2 (C57BL/6 x DBA/2) Villin-Cre           |                          |                  | eIMarijou2004 | kind gift from Sylvie Robine, Institut Curie-CNRS, Paris, France                          |
| C57BL/6J <i>Lsd1<sup>fl/fl</sup></i>        |                          |                  | Kerenyi2013   | kind gift from Stuart Orkin, Harvard Medical School, Boston, USA                          |
| B6.129P2 <i>Apc<sup>tm1Rsmj</sup>/RfoJ</i>  | Jackson Laboratories     | stock no: 029275 |               |                                                                                           |
| <i>Lgr5</i> -EGFP-IRES-CreERT2              | Jackson Laboratories     | stock no: 008875 |               |                                                                                           |
| <i>Hpgds</i> -tdTomato                      |                          |                  | Bornstein2018 |                                                                                           |
| <i>Neurog3</i> -RFP                         |                          |                  | Kim2015       | kind gift from Anne Grapin-Botton, DanStem, University of Copenhagen, Copenhagen, Denmark |
| <b>Cell lines</b>                           |                          |                  |               |                                                                                           |
| cell line producing Noggin                  |                          |                  |               | kind gift from Hans Clevers, Hubrecht Institute, Utrecht, The Netherlands                 |
| cell line producing R-Spondin               |                          |                  |               | kind gift from Calvin Kuo, Stanford University School of Medicine, Stanford, USA          |
| <b>Plates</b>                               |                          |                  |               |                                                                                           |
| 24-well plate                               | Corning                  | #3523            |               |                                                                                           |
| 96-well glass-bottom plate                  | Cellvis                  | #P-96-1N         |               |                                                                                           |
| 384-well optical plates                     | Applied Biosystems       | #4309849         |               |                                                                                           |
| 8-well microscopy slide                     | Ibidi                    | #80821           |               |                                                                                           |
| <b>Reagents</b>                             |                          |                  |               |                                                                                           |
| PBS                                         | Sigma-Aldrich            | #806552          |               |                                                                                           |
| EDTA                                        | Thermo Fisher Scientific | #15575020        |               |                                                                                           |
| TrypLE Express                              | Thermo Fisher Scientific | #12605010        |               |                                                                                           |
| Tamoxifen                                   | Sigma-Aldrich            | #T5648           |               |                                                                                           |
| Corn oil                                    | Sigma-Aldrich            | #C8267           |               |                                                                                           |
| FCS                                         | Gibco                    | #10270106        |               |                                                                                           |
| Saponin                                     | Sigma-Aldrich            | #8047-15-2       |               |                                                                                           |
| Triton X-100                                | Sigma-Aldrich            | #T8787           |               |                                                                                           |
| PFA                                         | Alfa Aesar               | #43368           |               |                                                                                           |
| <b>Organoid culture</b>                     |                          |                  |               |                                                                                           |
| Matrigel                                    | Corning                  | #734-1101        |               |                                                                                           |
| DMEM F12                                    | Gibco                    | #31330-038       |               |                                                                                           |
| Penicillin-Streptomycin                     | Sigma-Aldrich            | #P0781           |               |                                                                                           |
| HEPES                                       | Gibco                    | #35050061        |               |                                                                                           |
| Glutamax                                    | Gibco                    | #35050061        |               |                                                                                           |
| B-27 supplement                             | Gibco                    | #35050061        |               |                                                                                           |
| N2 supplement                               | Gibco                    | #17502001        |               |                                                                                           |
| N-Acetylcysteine                            | Sigma-Aldrich            | #A-7250          |               |                                                                                           |
| EGF Recombinant Mouse Protein               | Thermo Fisher Scientific | #PMG8041         |               |                                                                                           |
| CHIR99021                                   | Sigma-Aldrich            | #SML1046         |               |                                                                                           |
| Valproic acid (VPA)                         | Cayman Chemicals         | #13033           |               |                                                                                           |
| DAPT                                        | Cayman Chemicals         | #13197           |               |                                                                                           |
| IWP-2                                       | Cayman Chemicals         | #13951           |               |                                                                                           |
| <b>RNA isolation, qRT-PCR</b>               |                          |                  |               |                                                                                           |
| RNA-solv Reagent                            | Omega Bio-Tek            | #R6830-02        |               |                                                                                           |
| Direct-zol MiniPrep kit                     | Zymo Research            | #R2051           |               |                                                                                           |
| Direct-zol-96                               | Zymo Research            | #R2055           |               |                                                                                           |
| High-Capacity RNA-to-cDNA Kit               | Applied Biosystems       | #4388950         |               |                                                                                           |
| 2x Perfecta ROX,UNG Fast Mix                | Quanta Biosciences       | #733-1398        |               |                                                                                           |
| Primers                                     | Sigma-Aldrich            |                  |               | see Supplementary Table 2                                                                 |
| Universal ProbeLibrary probes               | Roche                    |                  |               | see Supplementary Table 2                                                                 |
| <b>Antibodies</b>                           |                          |                  |               |                                                                                           |
| <b>IF &amp; IHC staining reagents</b>       |                          |                  |               |                                                                                           |
| BD CompBead Anti-Mouse Ig                   | Becton Dickinson         | #552843          |               |                                                                                           |
| BD CompBead Anti-Rat and Anti-Hamster Ig    | Becton Dickinson         | #552845          |               |                                                                                           |
| DAPI                                        | Thermo Fisher Scientific | #62248           |               |                                                                                           |
| Hoechst 33342                               | Thermo Fisher Scientific | #62249           |               |                                                                                           |
| Zombie Aqua                                 | Biolegend                | #423102          |               |                                                                                           |
| TruStain FcX                                | Biolegend                | #101320          |               |                                                                                           |
| CD24-PerCp-Cy5.5, clone M1/69               | Biolegend                | #101824          |               |                                                                                           |
| CD24-AF647, clone M1/69                     | Biolegend                | #101818          |               |                                                                                           |
| CD44-AF647, clone IM7                       | Biolegend                | #103018          |               |                                                                                           |
| CD44-BV785, clone IM7                       | Biolegend                | #103041          |               |                                                                                           |
| CD117-PE-Cy7, clone ACK2                    | Biolegend                | #135112          |               |                                                                                           |
| CD326-BV421, clone G8.8                     | Biolegend                | #118225          |               |                                                                                           |
| CD326-BV605, clone G8.8                     | Biolegend                | #118227          |               |                                                                                           |
| UEA1-FITC, Ulex Europaeus Agglutinin I      | Invitrogen               | #L32476          |               |                                                                                           |
| UEA1-Rhodamine, Ulex Europaeus Agglutinin I | Vector Laboratories      | #RL-1062-2       |               |                                                                                           |
| Goat Anti-Rabbit IgG-BV421                  | Invitrogen               | #A-31556         |               |                                                                                           |
| Goat Anti-Rabbit IgG-AF488                  | Invitrogen               | #A-11034         |               |                                                                                           |
| anti-DCLK1                                  | Abcam                    | #ab31704         |               |                                                                                           |
| anti-MUC2                                   | Santa Cruz               | #sc-15334        |               |                                                                                           |
| anti-Ki67                                   | Invitrogen               | #MAS-14520       |               |                                                                                           |
| Fluoromount G                               | Invitrogen               | #00-4958-02      |               |                                                                                           |
| EnVision-HRP                                | Dako                     | #K4063 & #K4061  |               |                                                                                           |
| DAB                                         | Dako                     | #K5007           |               |                                                                                           |
| <b>mRNA sequencing</b>                      |                          |                  |               |                                                                                           |
| Quick-RNA MicroPrep kit                     | Zymo Research            | #R1050           |               |                                                                                           |
| Illumina TruSeq Stranded Total RNA          | Illumina                 |                  |               | I-CBP112 study, carried out at Genomics Core Facility, NTNU                               |
| Illumina N5500 MO flow-cell                 | Illumina                 |                  |               | I-CBP112 study, carried out at Genomics Core Facility, NTNU                               |
| NEB Next Ultra RNA Library Prep Kit         | NEB                      |                  |               | MS023 study, carried out at Novogene (UK) Co                                              |
| <b>Instruments</b>                          |                          |                  |               |                                                                                           |
| EVOS FL Auto2 microscope                    | Thermo Fisher Scientific |                  |               |                                                                                           |
| Eclipse Ci-L microscope                     | Nikon                    |                  |               |                                                                                           |
| LSM880 confocal microscope                  | Zeiss                    |                  |               |                                                                                           |
| Axio Imager Z1 confocal microscope          | Zeiss                    |                  |               |                                                                                           |
| NanoDrop-1000                               | NanoDrop                 |                  |               |                                                                                           |
| QuantStudio 5 Real-Time PCR system          | Thermo Fisher Scientific |                  |               |                                                                                           |
| BD LSRII flow cytometer                     | Becton Dickinson         |                  |               |                                                                                           |
| BD FACSAria III flow cytometer              | Becton Dickinson         |                  |               |                                                                                           |
| MACSQuant X flow cytometer                  | Miltenyi Biotec          |                  |               |                                                                                           |
| Viaflo 96-channel pipette                   | Integra Biosciences      |                  |               |                                                                                           |
| Qubit Fluorometric Quantitation system      | Life Technologies        |                  |               |                                                                                           |
| 2100 Bioanalyzer                            | Agilent                  |                  |               |                                                                                           |
| Illumina NextSeq 500                        | Illumina                 |                  |               |                                                                                           |
| Illumina NovaSeq 6000                       | Illumina                 |                  |               |                                                                                           |

| <b>Software</b>                        |                          |               |                               |
|----------------------------------------|--------------------------|---------------|-------------------------------|
| GNU R                                  |                          | v3.6.3        |                               |
| Bioconductor                           |                          | v3.10         |                               |
| tidyverse                              |                          | v1.3.0        | Wickham2019                   |
| ggpubr                                 |                          | v0.3.0        |                               |
| ggimage                                |                          | v0.2.8        |                               |
| magick                                 |                          | v2.3          |                               |
| pheatmap                               |                          | v1.0.12       |                               |
| ggtree                                 |                          | v2.0.4        | Yu2018                        |
| flowCore                               |                          | v1.53.17      |                               |
| CytoML/flowWorkspace                   |                          | v1.12.1       |                               |
| ggcyto                                 |                          | v1.14.1       | Van2018                       |
| flowViz                                |                          | 1.50.0        |                               |
| biomaRt                                |                          | v2.42.1       | Durinck2005                   |
| ClusterProfiler                        |                          | v3.14.3       | Yu2012                        |
| ImageJ/Fiji                            |                          | v1.52n        | Schindelin2012                |
| ilastik                                |                          | v1.3.2        | Berg2019                      |
| FlowJo software                        | FlowJo, LLC              | v10.6.2       |                               |
| QuantStudio Design & Analysis Software | Thermo Fisher Scientific | v1.5.1        |                               |
| FastQC                                 |                          | v0.11.8       |                               |
| MultiQC                                |                          | v1.7          | Ewels2016                     |
| featureCounts                          |                          | v1.6.4        | Liao2014                      |
| GNU R                                  |                          | v3.6.1        |                               |
| STAR                                   |                          | v2.7.3a       | Dobin2013                     |
| DESeq2                                 |                          | v1.26.0       | Love2014                      |
| <b>Datasets</b>                        |                          |               |                               |
| Ensembl                                |                          | GRCh38.p13    |                               |
| GENCODE annotation                     |                          | M18           | Frankish2019                  |
| STRING-DB                              |                          | v11           | Szklarczyk2019                |
| TRRUST                                 |                          | v2            | Han2018                       |
| IEC lineage signatures                 |                          | GSE92332      | Haber2017                     |
| LGR5+ stem cells                       |                          | GSE33949      | Munoz2012                     |
| GO:BP                                  |                          | GO Consortium | TheGeneOntologyConsortium2019 |
| tpm BRDs, PRMTs                        |                          | E-MTAB-9077   | Zwiggelaar2020                |
| tpm BRDs, PRMTs                        |                          | E-MTAB-78     | Zwiggelaar2020                |
| scRNA tpm Prmt1                        |                          | GSE92332      | Haber2017                     |
